# Supplementary material
Source: MDPI journal article supplement (https://www.mdpi.com/1999-4907/13/10/1594)
Supplement: s1 [file s1]

environmental protection

建構信度的計算

請輸入觀察變項的數目：

3

(X1.....X15為觀察變項，請輸入各指標變項的標準化因素負荷量)

|     |                  |     |                  |     |                  |    |
|-----|------------------|-----|------------------|-----|------------------|----|
| X1  | <div>0.826</div> | X2  | <div>0.854</div> | X3  | <div>0.715</div> | 計算 |
| X4  |                  | X5  |                  | X6  |                  |    |
| X7  |                  | X8  |                  | X9  |                  |    |
| X10 |                  | X11 |                  | X12 |                  |    |
| X13 |                  | X14 |                  | X15 |                  |    |

平均變異數抽取量

0.6409

組合信度

0.8419

離開

energy conservation

建構信度的計算

請輸入觀察變項的數目：

5

(X1.....X15為觀察變項，請輸入各指標變項的標準化因素負荷量)

|     |                  |     |                  |     |                  |    |
|-----|------------------|-----|------------------|-----|------------------|----|
| X1  | <div>0.791</div> | X2  | <div>0.873</div> | X3  | <div>0.775</div> | 計算 |
| X4  | <div>0.781</div> | X5  | <div>0.823</div> | X6  |                  |    |
| X7  |                  | X8  |                  | X9  |                  |    |
| X10 |                  | X11 |                  | X12 |                  |    |
| X13 |                  | X14 |                  | X15 |                  |    |

平均變異數抽取量

0.6551

組合信度

0.9046

離開

supervision and protection of rights

建構信度的計算

請輸入觀察變項的數目：

3

(X1.....X15為觀察變項，請輸入各指標變項的標準化因素負荷量)

|     |                  |     |                 |     |                  |
|-----|------------------|-----|-----------------|-----|------------------|
| X1  | <div>0.863</div> | X2  | <div>0.91</div> | X3  | <div>0.689</div> |
| X4  |                  | X5  |                 | X6  |                  |
| X7  |                  | X8  |                 | X9  |                  |
| X10 |                  | X11 |                 | X12 |                  |
| X13 |                  | X14 |                 | X15 |                  |

計算

清除

平均變異數抽取量

0.6825

組合信度

0.8642

離開

protection of animals

建構信度的計算

請輸入觀察變項的數目：

3

(X1.....X15為觀察變項，請輸入各指標變項的標準化因素負荷量)

|     |                  |     |                  |     |                  |
|-----|------------------|-----|------------------|-----|------------------|
| X1  | <div>0.873</div> | X2  | <div>0.937</div> | X3  | <div>0.825</div> |
| X4  |                  | X5  |                  | X6  |                  |
| X7  |                  | X8  |                  | X9  |                  |
| X10 |                  | X11 |                  | X12 |                  |
| X13 |                  | X14 |                  | X15 |                  |

計算

清除

平均變異數抽取量

0.7736

組合信度

0.9109

離開

emotional value

建構信度的計算

—□×

請輸入觀察變項的數目：

5

(X1.....X15為觀察變項，請輸入各指標變項的標準化因素負荷量)

|     |                  |     |                  |     |                  |    |
|-----|------------------|-----|------------------|-----|------------------|----|
| X1  | <div>0.867</div> | X2  | <div>0.908</div> | X3  | <div>0.882</div> | 計算 |
| X4  | <div>0.83</div>  | X5  | <div>0.887</div> | X6  |                  |    |
| X7  |                  | X8  |                  | X9  |                  |    |
| X10 |                  | X11 |                  | X12 |                  |    |
| X13 |                  | X14 |                  | X15 |                  |    |

平均變異數抽取量

0.7659

組合信度

0.9424

離開

functional value

建構信度的計算

—□×

請輸入觀察變項的數目：

3

(X1.....X15為觀察變項，請輸入各指標變項的標準化因素負荷量)

|     |                  |     |                  |     |                  |    |
|-----|------------------|-----|------------------|-----|------------------|----|
| X1  | <div>0.804</div> | X2  | <div>0.769</div> | X3  | <div>0.579</div> | 計算 |
| X4  |                  | X5  |                  | X6  |                  |    |
| X7  |                  | X8  |                  | X9  |                  |    |
| X10 |                  | X11 |                  | X12 |                  |    |
| X13 |                  | X14 |                  | X15 |                  |    |

平均變異數抽取量

0.5243

組合信度

0.7645

離開

social value

 建構信度的計算

—

□

×

請輸入觀察變項的數目：

3

(X1.....X15為觀察變項，請輸入各指標變項的標準化因素負荷量)

|     |                  |     |                  |     |                  |    |
|-----|------------------|-----|------------------|-----|------------------|----|
| X1  | <div>0.817</div> | X2  | <div>0.925</div> | X3  | <div>0.881</div> | 計算 |
| X4  |                  | X5  |                  | X6  |                  |    |
| X7  |                  | X8  |                  | X9  |                  | 清除 |
| X10 |                  | X11 |                  | X12 |                  |    |
| X13 |                  | X14 |                  | X15 |                  |    |

平均變異數抽取量

0.7664

組合信度

0.9076

離開

ecological value

 建構信度的計算

—

□

×

請輸入觀察變項的數目：

3

(X1.....X15為觀察變項，請輸入各指標變項的標準化因素負荷量)

|     |                  |     |                  |     |                  |    |
|-----|------------------|-----|------------------|-----|------------------|----|
| X1  | <div>0.932</div> | X2  | <div>0.904</div> | X3  | <div>0.935</div> | 計算 |
| X4  |                  | X5  |                  | X6  |                  |    |
| X7  |                  | X8  |                  | X9  |                  | 清除 |
| X10 |                  | X11 |                  | X12 |                  |    |
| X13 |                  | X14 |                  | X15 |                  |    |

平均變異數抽取量

0.8534

組合信度

0.9458

離開

consumption attitude

建構信度的計算

請輸入觀察變項的數目: 3

(X1...X15為觀察變項, 請輸入各指標變項的標準化因素負荷量)

|     |       |     |       |     |       |
|-----|-------|-----|-------|-----|-------|
| X1  | 0.885 | X2  | 0.906 | X3  | 0.657 |
| X4  |       | X5  |       | X6  |       |
| X7  |       | X8  |       | X9  |       |
| X10 |       | X11 |       | X12 |       |
| X13 |       | X14 |       | X15 |       |

計算

清除

平均變異數抽取量: 0.6786

組合信度: 0.8614

離開

low-carbon consumption behavior intention

建構信度的計算

請輸入觀察變項的數目: 3

(X1...X15為觀察變項, 請輸入各指標變項的標準化因素負荷量)

|     |       |     |       |     |       |
|-----|-------|-----|-------|-----|-------|
| X1  | 0.891 | X2  | 0.968 | X3  | 0.849 |
| X4  |       | X5  |       | X6  |       |
| X7  |       | X8  |       | X9  |       |
| X10 |       | X11 |       | X12 |       |
| X13 |       | X14 |       | X15 |       |

計算

清除

平均變異數抽取量: 0.8172

組合信度: 0.9304

離開
